# Supplementary material for: Single-cell transcriptome analysis reveals immunosuppressive landscape in overweight and obese colorectal cancer
Source: Springer Nature journal article supplement (doi:10.1186/s12967-024-04921-5), 2024-02-04

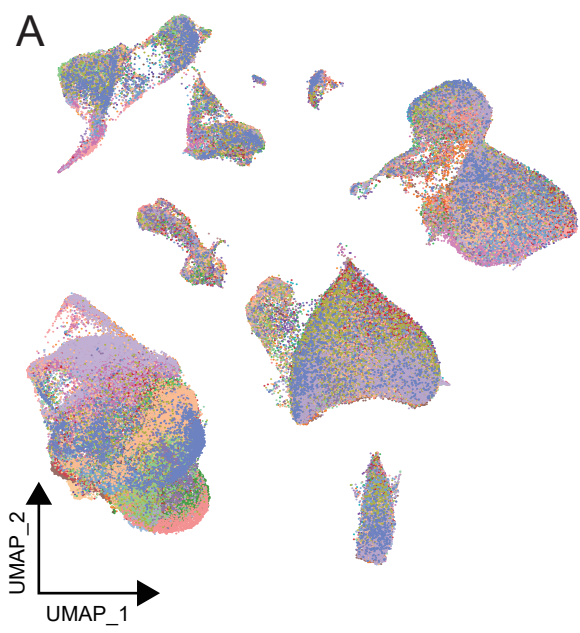

- ① P1-Obese-T
- ② P2-Obese-T
- ③ P3-Obese-T
- ④ P4-Obese-T
- ⑤ P5-Obese-T
- ⑥ P6-Obese-T
- ⑦ P7-Obese-T
- ⑧ P8-Obese-T
- ⑨ P9-Obese-T
- ⑩ P9-Obese-N
- ⑪ P10-Obese-T
- ⑫ P11-Obese-T
- ⑬ P12-Obese-T
- ⑭ P13-Obese-T
- ⑮ P14-Obese-T
- ⑯ P15 -Obese-N
- ⑰ P16-Non\_obese-T
- ⑱ P17-Non\_obese-T
- ⑲ P18-Non\_obese-T
- ⑳ P19-Non\_obese-T
- ㉑ P19-Non\_obese-N
- ㉒ P20-Non\_obese-T
- ㉓ P21-Non\_obese-T
- ㉔ P22-Non\_obese-T
- ㉕ P23-Non\_obese-T
- ㉖ P24-Non\_obese-T
- ㉗ P24-Non\_obese-N
- ㉘ P25-Non\_obese-T
- ㉙ P26-Non\_obese-T
- ㉚ P26-Non\_obese-N
- ㉛ P27-Non\_obese-T
- ㉜ P28-Non\_obese-T
- ㉝ P29-Non\_obese-T
- ㉞ P30-Non\_obese-T

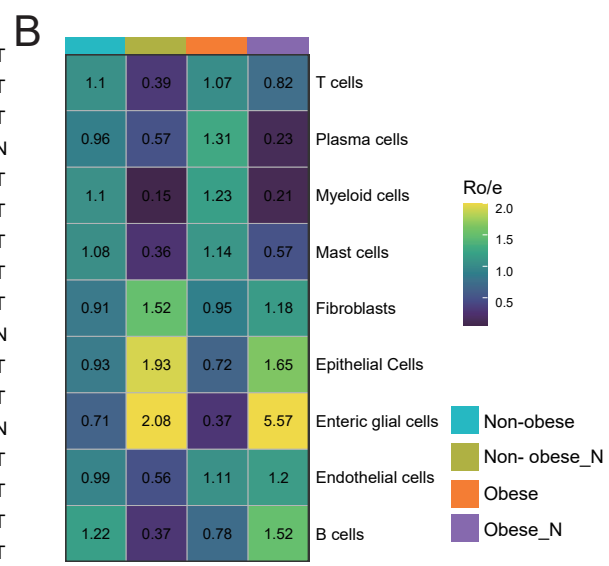

Supplement: MOESM3 [file 26698976]
