# Supplementary material for: Single-cell transcriptome analysis reveals immunosuppressive landscape in overweight and obese colorectal cancer
Source: Springer Nature journal article supplement (doi:10.1186/s12967-024-04921-5), 2024-02-04

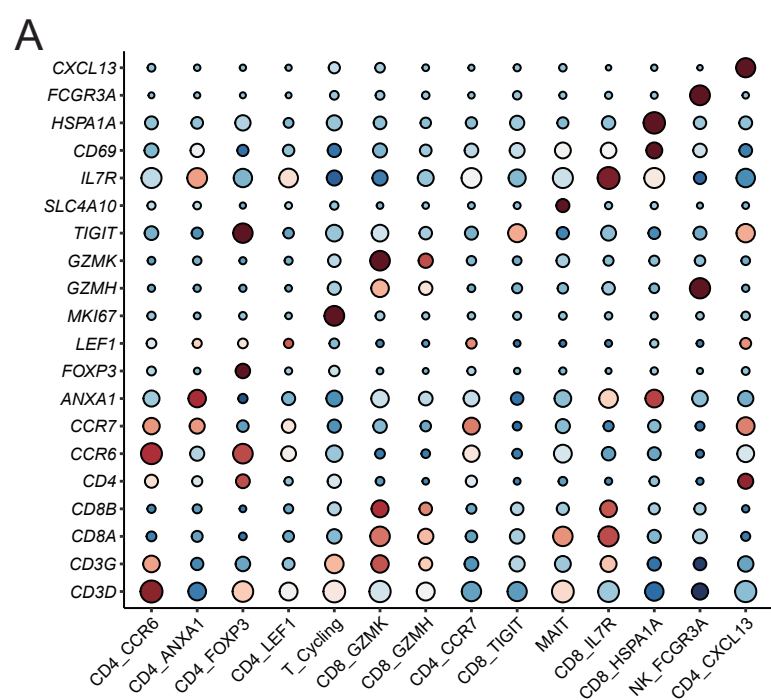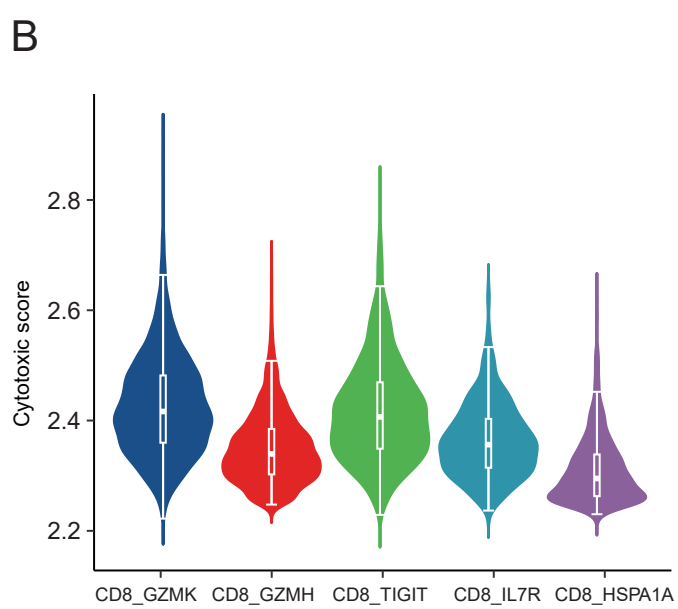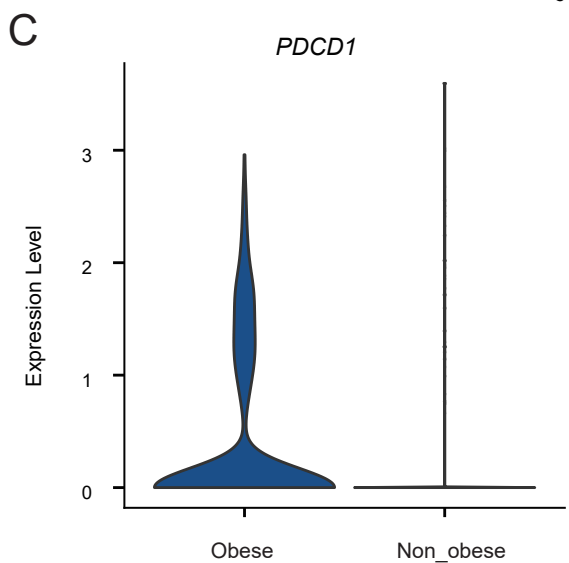

Supplement: MOESM4 [file 26698976]
